# Supplementary material
Source: publisher site journal article supplement (https://www.kjim.org/upload/media/kjim-2020-634-suppl4.pdf)
Supplement: Supplementary file 1 [file kjim-2020-634-suppl4.pdf]

**Supplementary Table 4. Cox's regression analysis seeking risk factors for thrombosis occurring after diagnosis of myeloproliferative neoplasms (n = 335)**

| Variable                               | Univariate analysis |           |         | Multivariate analysis |           |         |
|----------------------------------------|---------------------|-----------|---------|-----------------------|-----------|---------|
|                                        | HR                  | 95% CI    | p value | HR                    | 95% CI    | p value |
| Age > 60 years                         | 1.20                | 0.49–2.93 | 0.697   | -                     | -         | -       |
| Male sex                               | 1.65                | 0.65–4.15 | 0.290   | -                     | -         | -       |
| Palpable splenomegaly                  | 0.57                | 0.07–4.45 | 0.595   | -                     | -         | -       |
| WBC > 12.0 × 10 <sup>9</sup> /L        | 0.64                | 0.25–1.61 | 0.344   | -                     | -         | -       |
| Platelets > 1,000 × 10 <sup>9</sup> /L | 1.00                | 0.36–2.81 | 0.996   | -                     | -         | -       |
| LDH > 1.5 × UNL                        | 1.49                | 0.56–3.96 | 0.426   | -                     | -         | -       |
| Positive for JAK2V617F                 | 1.49                | 0.42–5.33 | 0.545   | -                     | -         | -       |
| Prior thrombosis                       | 1.61                | 0.63–4.14 | 0.322   | -                     | -         | -       |
| ET                                     | 0.81                | 9.33–1.98 | 0.639   | -                     | -         | -       |
| Pre-PMF                                | 0.19                | 0.02–1.50 | 0.116   | -                     | -         | -       |
| PV                                     | 2.31                | 0.96–5.52 | 0.061   | 2.16                  | 0.90–5.19 | 0.084   |
| Hypertension                           | 1.43                | 0.60–3.40 | 0.423   | -                     | -         | -       |
| Diabetes mellitus                      | 0.92                | 0.30–2.81 | 0.881   | -                     | -         | -       |
| Chronic kidney disease                 | 2.68                | 1.12–6.43 | 0.027   | 2.51                  | 1.05–6.04 | 0.040   |
| Smoking                                | 1.32                | 0.52–3.34 | 0.565   | -                     | -         | -       |

HR, hazard ratio; CI, confidence interval; WBC, white blood cell; LDH, lactate dehydrogenase; UNL, upper normal limit; JAK2, Janus kinase 2; ET, essential thrombocythemia; pre-PMF, prefibrotic/early primary myelofibrosis; PV, polycythemia vera.
